# Supplementary material for: Reliability of measuring regional callosal atrophy in neurodegenerative diseases
Source: PubMed Central journal article supplement — Neuroimage Clin. 2016 Oct 15;12:825–31. doi: 10.1016/j.nicl.2016.10.012 (PMC5094205; doi:10.1016/j.nicl.2016.10.012), 2016-10-15

## Supplementary Figures

**Figure S1.** Plot of the CC variations along the 3 first principal components (PC). Each row depicts the variation along one PC. Centre images: Average CC over a group of 100 healthy controls, Left = Average CC - 3 standard deviations along on of the PCs (blue : resulting CC, red : streamlines starting from the average CC along the respective PC, Right = average CC + 3 standard deviations (blue: resulting CC, red: streamlines starting from the average CC along the respective PC).

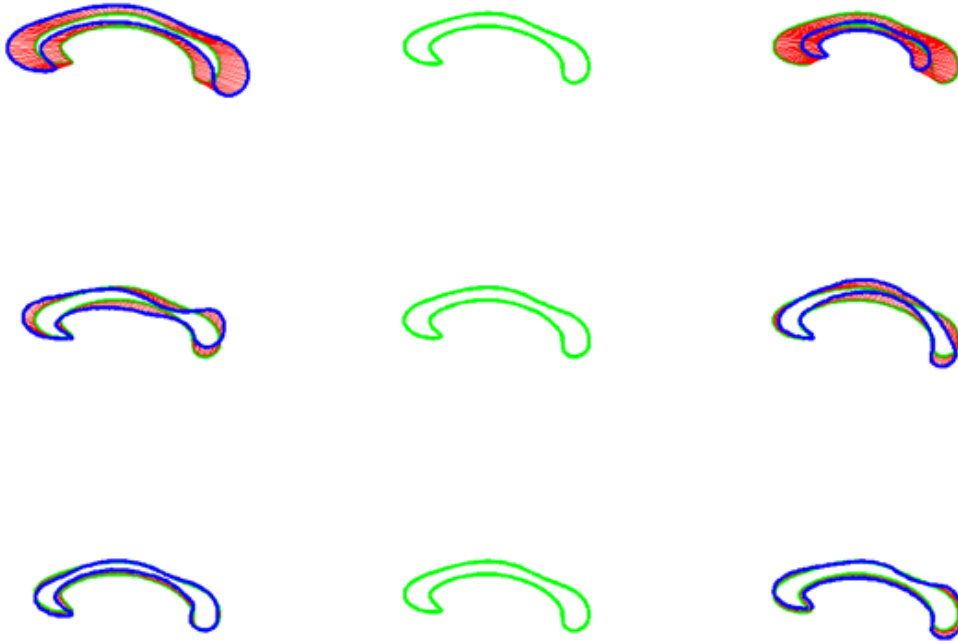

**Figure S2.** Calculation of the Corpus Callosum Index (introduced as a practical measure to analyse MR images by [Figueira et al., 2007] ). First the longest possible axis between anterior and posterior part is determined (AP-axis). Secondly, in the middle of this axis and perpendicular to the AP axis, a midline is constructed. Both the AP-axis as the perpendicular midline are depicted in green. Next, the thicknesses are calculated (between the red stars). The corpus callosum index is defined as the sum of this thicknesses ( $AA'+BB'+CC'$ ) divided by the length of the AP axis ( $AB'$ ).

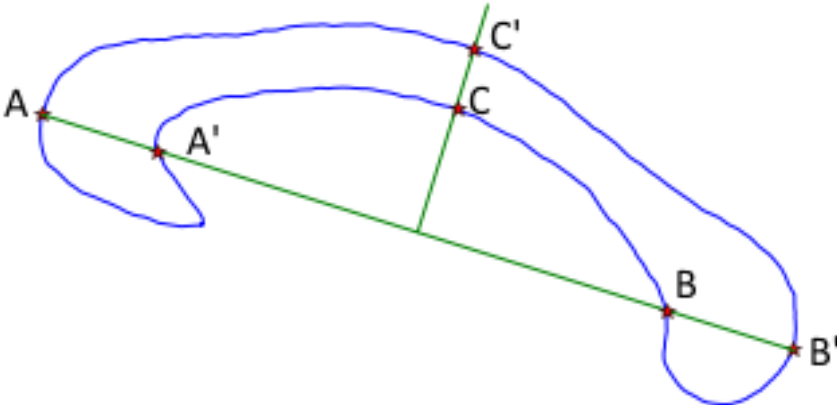

Supplement: mmc1.pdf [file mmc1.pdf]
